# Supplementary material
Source: Research Square preprint supplement (doi:10.21203/rs.3.rs-9082114/v1)
Supplement: Supplementary file 1 [file 993fc1b6880f0bd6ccadbe55.xlsx]

## Sheet: Table S1
Table S1. 34 species and accessions used for phylogenetic analysis
Species	Accession number	Genus	Subgenus	Section	Series
Arabidopsis thaliana	NC_000932	Arabidopsis
Populus trichocarpa	NC_009143	Populus
Angophora costata	NC_022412	Angophora
Angophora floribunda	NC_022411	Angophora
Corymbia maculata	M024704	Corymbia
Corymbia torelliana	NC_028410	Corymbia
Corymbia citriodora	KP015029	Corymbia
Eucalyptus microcorys	CM024596	Eucalyptus	Alveolata
Eucalyptus erythrocorys	CM024631	Eucalyptus	Eudesmia	Limbatae	Erythrocorythosae
Eucalyptus tenuipes	CM024560	Eucalyptus	Cuboidea
Eucalyptus cloeziana	CM024645	Eucalyptus	Idiogenes
Eucalyptus marginata	CM024608	Eucalyptus	Eucalyptus	Longistylus	Occidentales
Eucalyptus regnans	CM024489	Eucalyptus	Eucalyptus	Eucalyptus	Eucalyptus
Eucalyptus elata	KC180776	Eucalyptus	Eucalyptus	Eucalyptus	Radiatae
Eucalyptus umbra	KC180778	Eucalyptus	Eucalyptus	Amentum	White-mahoganies
Eucalyptus baxteri	KC180773	Eucalyptus	Eucalyptus	Eucalyptus	Pachyphloiae
Eucalyptus pumila	CM027858	Eucalyptus	Symphyomyrtus	Pumilae	Pumilae
Eucalyptus decipiens	CM024632	Eucalyptus	Symphyomyrtus	Bisectae	Falcatae
Eucalyptus fibrosa	CM029545	Eucalyptus	Symphyomyrtus	Adnataria	Siderophloiae
Eucalyptus dawsonii	CM027883	Eucalyptus	Symphyomyrtus	Adnataria	Buxeales
Eucalyptus paniculata	CM029480	Eucalyptus	Symphyomyrtus	Adnataria	Rhodoxyla
Eucalyptus melliodora	CM041005	Eucalyptus	Symphyomyrtus	Adnataria	Melliodorae
Eucalyptus sideroxylon	CM024561	Eucalyptus	Symphyomyrtus	Adnataria	Melliodorae
Eucalyptus sideroxylon x Eucalyptus melliodora	CM027857	Eucalyptus	Symphyomyrtus		Melliodorae
Eucalyptus cladocalyx	CM029529	Eucalyptus	Symphyomyrtus	Sejunctae
Eucalyptus virginea	CM024525	Eucalyptus	Symphyomyrtus	Bisectae	Curviptera
Eucalyptus camaldulensis	CM024681	Eucalyptus	Symphyomyrtus	Exsertaria	Exsertae
Eucalyptus grandis	NC_014570	Eucalyptus	Symphyomyrtus	Latoangulatae	Transversae
Eucalyptus urophylla	PV464070	Eucalyptus	Symphyomyrtus	Latoangulatae	Transversae
Eucalyptus urophylla × E. grandis	OL804288	Eucalyptus	Symphyomyrtus	Latoangulatae	Transversae
Eucalyptus globulus	CM024728	Eucalyptus	Symphyomyrtus	Maidenaria	Globulares
Eucalyptus smithii	MN736961	Eucalyptus	Symphyomyrtus	Maidenaria	Viminales
Eucalyptus nitens	KC180788	Eucalyptus	Symphyomyrtus	Maidenaria	Remanentes
Eucalyptus aromaphloia	KC180789	Eucalyptus	Symphyomyrtus	Maidenaria	Viminales

## Sheet: Table S2
Table S2 .SSR information in the chloroplast genomes of tewlve eucalypt species
Species		SSR types
	Total number	Mononucleotide	Dinucleotide	Trinucleotide	Tetranucleotide
Eucalyptus urograndis	102	A/T	AT/TC	TTA/GAA/ATT/GAA	ATAG/CTTG/ATTA/TAAG/ATAA/TTTC/AATA/TAAT/TTAA
Eucalyptus urophylla	102	A/T	AT/GA/TA	AAG/CTT/AAT/ATT	AAAT/AATA/AGAAATAG/CAAG/CTTATAAT/TCTA/TTAA/TTTA
Corymbia citriodora	115	A/T	TC	TTA/TAT/AAT/CTT/ATA/GAA/ATT/TAA	AAAT/AATA/ATAA/ATAG/ATTA/ATTT/CTAT/CTTG/TAAG/TAAT/TTAA/TTTC
Eucalyptus elata	86	A/T	TC	CTT/GAA/AAT	ATAG/TTAA/CTTG/ATTA/TAAG/ATAA/TTTC/AATA
Eucalyptus obliqua	81	A/T	AT/TC	ATT/CTT/GAA/TTA	AATA/ATAA/ATAG/ATTA/ATTT/CTTG/TAAG/TTAA/TTTC
Eucalyptus pauciflora	93	A/T	AT/TC	AAT/CTT/GAA	AATA/ATAA/ATAG/ATTA/CTTG/TAAG/TTAA/TTTC
Eucalyptus camaldulensis	106	A/T	AT/TC	AAT/CTT/GAA/TAA	ATAA/ATAG/ATTA/ATTT/CTTG/TAAG/TATT/TCTA/TTAA/TTTC
Eucalyptus grandis	68	A/T	AT/TC	AAT/CTT/GAA/TAA	AATA/ATAA/ATAG/ATTA/ATTT/CTTG/TAAG/TAAT/TTAA/TTTC
Eucalyptus smithii	100	A/T	AT/TC	AAT/CTT/GAA/TAA	AAAT/AATA/ATAG/ATTA/ATTT/CTTG/TAAG/TAAT/TTAA/TTTC
Eucaluptus globulus	96	A/T	AT/TC	AAT/CTT/GAA/TAA	AAAT/AATA/ATAG/ATAA/ATTT/CTTG/TAAG/TAAT/TTAA/TTTC
Eucaluptus nitens	100	A/G/T	AT/TC	AAT/CTT/GAA/TAA	AATA/ATAA/ATAG/ATTA/CTTG/TAAG/TAAT/TTAA/TTTC
Eucaluptus robusta	102	A/T	AT/TC	AAT/CTT/GAA/TAA	AATA/ATAA/ATAG/ATTA/CTTG/TAAG/TAAT/TTAA/TTTC

## Sheet: Table S3
Table S3. Sliding window analysis of Pi in the chloroplast genomes of E. urograndis, E. urophylla and E. grandis.
Window	Midpoint	Pi	Theta	S	Gene
1-27388	26907	0.30667	0.30556	275
26771-27771	27177	0.29556	0.29556	266	psbA
27023-28065	27570	0.29333	0.29333	264	psbA
27389-28357	27910	0.30722	0.30667	276	psbA,trnKUUU
27772-28703	28219	0.32222	0.32111	289	psbA,trnKUUU
28066-28964	28553	0.32556	0.32444	292	trnKUUU,matK
28358-29218	28861	0.32278	0.32222	290	trnKUUU,matK
28704-29501	29104	0.31	0.31	279	trnKUUU,matK
28965-29791	29360	0.31333	0.31333	282	trnKUUU,matK
29219-30053	29672	0.31722	0.31667	285	trnKUUU,matK
29502-30372	29914	0.32	0.31889	287	trnKUUU,matK
29792-30616	30209	0.32444	0.32333	291	trnKUUU,matK
30054-30931	30482	0.32889	0.32778	295	trnKUUU
30373-31162	30752	0.345	0.34333	309	trnKUUU
30617-31451	31044	0.32611	0.32444	292	trnKUUU
30932-31682	31283	0.32556	0.32444	292
31163-31979	31568	0.31	0.31	279
31452-32293	31805	0.305	0.30444	274	rps16
31683-32548	32147	0.30611	0.30556	275	rps16
31980-32859	32427	0.30056	0.3	270	rps16
32294-33157	32693	0.31556	0.31556	284	rps16
32549-33450	33040	0.30444	0.30444	274	rps16
32860-33848	33321	0.31444	0.31444	283
33158-34157	33731	0.29222	0.29222	263	trnQUUG
33451-34397	34018	0.31	0.31	279	trnQUUG,psbK
33849-34646	34264	0.31778	0.31778	286	trnQUUG,psbK
34158-34923	34533	0.32111	0.32111	289	psbK
34409-35224	34799	0.30667	0.30667	276	psbK,psbI
34647-35481	35088	0.29444	0.29444	265	psbI,trnSGCU
34924-35745	35364	0.31556	0.31556	284	psbI,trnSGCU
35225-36018	35609	0.31556	0.31556	284	trnSGCU
35482-36285	35875	0.32333	0.32333	291	trnGUCC
35746-36576	36129	0.31111	0.31111	280	trnGUCC
36019-36920	36417	0.30167	0.30111	271	trnGUCC
36286-37182	36704	0.29944	0.29889	269	trnGUCC
36577-37446	37069	0.29611	0.29556	266	trnGUCC,trnRUCU
36921-37742	37310	0.29722	0.29667	267	trnG-UCC,trnRUCU
37183-38015	37601	0.29389	0.29333	264	trnRUCU
37447-38270	37879	0.30167	0.30111	271	atpA
37743-38571	38147	0.29833	0.29778	268	atpA
38016-38791	38409	0.30944	0.30889	278	atpA
38271-39078	38681	0.315	0.31444	283	atpA,atpF
38572-39337	38976	0.32611	0.32556	293	atpA,atpF
38792-39617	39207	0.31	0.30889	278	atpA,atpF
39079-39876	39467	0.30222	0.30111	271	atpA,atpF
39338-40142	39762	0.31056	0.31	279	atpF
39618-40398	40019	0.31778	0.31778	286	atpF
39877-40680	40265	0.32778	0.32778	295	atpF
40143-40946	40530	0.32222	0.32222	290	atpF
40399-41224	40808	0.33111	0.33111	298	atpF,atpH
40681-41516	41079	0.32111	0.32111	289	atpH
40947-41748	41377	0.31556	0.31556	284	atpH
41225-42061	41635	0.30222	0.30222	272	atpH
41517-42345	41913	0.29667	0.29667	267
41749-42611	42217	0.29889	0.29889	269	atpI
42062-42886	42486	0.31333	0.31333	282	atpI
42346-43129	42749	0.33111	0.33111	298	atpI,rps2
42612-43418	43028	0.32944	0.32889	296	atpI,rps2
42887-43709	43264	0.32722	0.32667	294	atpI,rps2
43130-43982	43556	0.31611	0.31556	284	atpI,rps2
43419-44271	43856	0.31556	0.31556	284	rps2
43716-44603	44130	0.31111	0.31	279	rps2,rpoC2
43983-44867	44461	0.30722	0.30556	275	rps2,rpoC2
44272-45178	44740	0.29944	0.29778	268	rpoC2
44604-45578	45030	0.29056	0.29	261	rpoC2
44868-45881	45430	0.28778	0.28778	259	rpoC2
45179-46189	45702	0.305	0.30444	274	rpoC2
45579-46503	45996	0.31278	0.31222	281	rpoC2
45882-46784	46309	0.31389	0.31333	282	rpoC2
46190-47098	46627	0.29889	0.29889	269	rpoC2
46504-47445	46939	0.28444	0.28444	256	rpoC2
46785-47758	47250	0.27444	0.27444	247	rpoC2
47099-48028	47648	0.27556	0.27556	248	rpoC2
47446-48391	47906	0.28111	0.28	252	rpoC2
47759-48867	48206	0.28222	0.28111	253	rpoC2,rpoC1
48029-49246	48573	0.26889	0.26778	241	rpoC2,rpoC1
48403-49495	48980	0.28444	0.28444	256	rpoC2,rpoC1
48868-49809	49381	0.28889	0.28889	260	rpoC1
49247-50085	49595	0.30556	0.30556	275	rpoC1
49496-50414	49946	0.29222	0.29222	263	rpoC1
49810-50666	50228	0.29444	0.29444	265	rpoC1
50086-50913	50526	0.30667	0.30667	276	rpoC1
50415-51195	50793	0.31111	0.31111	280	rpoC1
50667-51445	51040	0.32111	0.32111	289	rpoC1
50914-51865	51316	0.30444	0.30444	274	rpoC1
51196-52117	51735	0.31111	0.31111	280	rpoC1
51446-52393	52015	0.31	0.31	279	rpoB
51866-52769	52252	0.29889	0.29889	269	rpoB
52118-53120	52647	0.29889	0.29889	269	rpoB
52394-53430	52884	0.29889	0.29889	269	rpoB
52770-53745	53260	0.31111	0.31111	280	rpoB
53121-53980	53587	0.32111	0.32111	289	rpoB
53431-54251	53869	0.30889	0.30889	278	rpoB
53746-54515	54085	0.31778	0.31778	286	rpoB
53981-54816	54404	0.30778	0.30778	277	rpoB
54252-55149	54651	0.31	0.31	279	rpoB
54516-55423	54983	0.29	0.29	261	rpoB
54817-55713	55278	0.29667	0.29667	267
55150-56021	55571	0.31	0.31	279	trnCGCA
55424-56291	55829	0.32556	0.32556	293	trnCGCA
55714-56701	56176	0.31222	0.31222	281	trnCGCA
56022-57073	56452	0.30222	0.30222	272	petN
56292-57354	56891	0.30667	0.30667	276	petN
56702-57628	57200	0.31667	0.31667	285	petN
57074-57934	57511	0.32111	0.32111	289	psbM
57355-58248	57757	0.32722	0.32667	294	psbM
57629-58534	58105	0.31167	0.31111	280	psbM
57935-58764	58370	0.32056	0.32	288	psbM
58249-59156	58650	0.30556	0.30556	275	trnDGUC
58535-59442	58947	0.29889	0.29889	269	trnDGUC
58765-59719	59320	0.29611	0.29556	266	trnDGUC
59157-60072	59599	0.305	0.30444	274	trnDGUC,trnEUUC
59443-60359	59941	0.33056	0.33	297	trnYGUA,trnEUUC
59720-60616	60221	0.32611	0.32556	293	trnYGUA,trnEUUC
60073-60864	60494	0.33833	0.33778	304	trnTGGU
60360-61107	60723	0.34278	0.34222	308	trnTGGU
60617-61388	60970	0.34889	0.34889	314	trnTGGU
60865-61675	61251	0.33556	0.33556	302	trnTGGU
61108-61924	61535	0.32889	0.32889	296
61389-62184	61809	0.31	0.31	279
61676-62457	62051	0.31222	0.31222	281
61925-62765	62327	0.29222	0.29222	263	psbD
62185-62997	62647	0.30111	0.30111	271	psbD
62458-63464	62892	0.27667	0.27667	249	psbD,psbC
62766-63722	63183	0.29444	0.29444	265	psbD,psbC
63013-63998	63595	0.29889	0.29889	269	psbD,psbC
63465-64244	63880	0.32556	0.32556	293	psbC
63723-64525	64130	0.31333	0.31333	282	psbC
63999-64886	64387	0.3	0.3	270	psbC
64245-65117	64698	0.29389	0.29333	264	psbC
64526-65389	65012	0.29833	0.29778	268	psbC
64887-65682	65264	0.30389	0.30333	273	trnSUGA
65118-65944	65500	0.3	0.3	270	psbZ
65390-66229	65821	0.30333	0.30333	273	psbZ
65683-66530	66060	0.30278	0.30222	272	trnfMCAU
65945-66761	66380	0.31278	0.31222	281	trnfMCAU
66230-67029	66647	0.31389	0.31333	282	trnfMCAU
66531-67277	66917	0.32667	0.32667	294	trnfMCAU
66762-67556	67150	0.32556	0.32556	293	rps14
67030-67830	67417	0.32333	0.32333	291	psaB
67278-68155	67721	0.32444	0.32444	292	psaB
67557-68521	68032	0.31222	0.31222	281	psaB
67831-68823	68303	0.31667	0.31667	285	psaB
68156-69141	68659	0.30667	0.30667	276	psaB
68522-69386	68970	0.32778	0.32778	295	psaB
68824-69607	69247	0.34111	0.34111	307	psaB
69142-69930	69497	0.34111	0.34111	307	psaB
69387-70214	69770	0.32667	0.32667	294	psaA
69608-70448	70090	0.31556	0.31556	284	psaA
69931-70742	70331	0.32333	0.32333	291	psaA
70215-71090	70582	0.29389	0.29333	264	psaA
70449-71361	70911	0.27722	0.27667	249	psaA
70743-71646	71232	0.28056	0.28	252	psaA
71091-71940	71514	0.31056	0.31	279	psaA
71362-72247	71801	0.32389	0.32333	291	psaA
71647-72487	72101	0.325	0.32444	292	pafI
71941-72801	72364	0.33667	0.33667	303	pafI
72248-73100	72635	0.33222	0.33222	299	pafI
72488-73364	72977	0.32222	0.32222	290	pafI
72802-73716	73215	0.32111	0.32111	289	pafI
73101-74048	73520	0.32778	0.32778	295	pafI
73365-74372	73904	0.33444	0.33444	301	pafI
73717-74637	74258	0.33444	0.33444	301	pafI
74049-74900	74479	0.33	0.33	297	pafI
74373-75218	74782	0.32889	0.32889	296	pafI,trnSGGA
74638-75519	75020	0.32667	0.32667	294	trnSGGA
74901-75892	75354	0.32778	0.32778	295	trnSGGA
75219-76175	75675	0.32889	0.32889	296	trnSGGA
75520-76471	76019	0.32556	0.32556	293	rps4
75893-76767	76287	0.33333	0.33333	300	rps4
76176-77027	76589	0.33222	0.33222	299	trnTUGU
76472-77319	76907	0.33444	0.33444	301
76768-77587	77152	0.32778	0.32778	295
77028-77883	77470	0.32444	0.32444	292	trnLUAA
77320-78193	77752	0.32111	0.32111	289	trnLUAA
77588-78463	78039	0.29556	0.29556	266	trnLUAA,trnFGAA
77884-78689	78339	0.29333	0.29333	264	trnLUAA,trnFGAA
78194-79030	78580	0.29556	0.29556	266	trnLUAA,trnFGAA
78464-79317	78826	0.30444	0.30444	274	trnFGAA
78690-79678	79186	0.29444	0.29444	265	ndhJ
79031-79891	79515	0.30667	0.30667	276	ndhJ,ndhK
79318-80144	79788	0.33	0.33	297	ndhJ,ndhK
79679-80421	80037	0.34667	0.34667	312	ndhJ,ndhK
79892-80716	80265	0.33444	0.33444	301	ndhK,ndhC
80145-81036	80591	0.31222	0.31222	281	ndhK,ndhC
80422-81411	80871	0.31	0.31	279	ndhK,ndhC
80717-81698	81232	0.30444	0.30444	274	ndhC
81037-82016	81566	0.31111	0.31111	280	trnVUAC
81412-82283	81892	0.31222	0.31222	281	trnVUAC
81699-82549	82156	0.31222	0.31222	281	trnVUAC,trnMCAU
82017-82773	82395	0.32222	0.32222	290	trnVUAC,trnMCAU
82284-83081	82663	0.31	0.31	279	trnMCAU,atpE,atpB
82550-83353	82930	0.31778	0.31778	286	atpE,atpB
82774-83642	83249	0.30556	0.30556	275	atpE,atpB
83082-83931	83477	0.30778	0.30778	277	atpB
83354-84200	83789	0.29278	0.29222	263	atpB
83643-84467	84079	0.29722	0.29667	267	atpB
83932-84751	84356	0.295	0.29444	265	atpB
84201-85029	84613	0.30222	0.30222	272	atpB
84473-85332	84903	0.30444	0.30444	274	atpB
84752-85611	85156	0.31444	0.31444	283	rbcL
85030-85853	85492	0.32556	0.32556	293	rbcL
85333-86139	85732	0.32111	0.32111	289	rbcL
85612-86392	85996	0.32222	0.32222	290	rbcL
85854-86703	86265	0.31222	0.31222	281	rbcL
86140-86981	86543	0.32556	0.32556	293	rbcL
86393-87315	86803	0.32111	0.32111	289	rbcL
86704-87558	87099	0.32556	0.32556	293	rbcL,accD
86982-87837	87441	0.32222	0.32222	290	accD
87316-88160	87701	0.30778	0.30778	277	accD
87563-88468	87985	0.29667	0.29667	267	accD
87838-88771	88305	0.28778	0.28778	259	accD
88161-89047	88639	0.30778	0.30778	277	accD
88469-89329	88884	0.30889	0.30889	278	accD
88772-89635	89206	0.30667	0.30556	275	accD
89048-89921	89487	0.28944	0.28778	259	psaI
89330-90231	89773	0.29167	0.29	261	psaI
89636-90479	90100	0.305	0.30444	274	psaI,pafⅡ
89922-90779	90336	0.31889	0.31889	287	pafⅡ
90232-91067	90639	0.31889	0.31889	287	pafⅡ
90515-91304	90945	0.32444	0.32444	292	pafⅡ
90780-91599	91180	0.33	0.33	297	pafⅡ
91068-91845	91419	0.33889	0.33889	305	cemA
91305-92161	91724	0.33	0.33	297	cemA
91600-92431	92027	0.31667	0.31667	285	cemA
91846-92785	92282	0.31222	0.31222	281	cemA
92162-93058	92596	0.32556	0.32556	293	cemA,petA
92432-93360	92951	0.32889	0.32889	296	cemA,petA
92786-93663	93188	0.33	0.33	297	petA
93059-93919	93525	0.31111	0.31111	280	petA
93380-94178	93788	0.31556	0.31556	284	petA
93664-94462	94045	0.31889	0.31889	287	petA
93920-94778	94316	0.29778	0.29778	268	psbJ
94179-95181	94637	0.3	0.3	270	psbJ,psbL,psbF
94478-95443	94926	0.29556	0.29556	266	psbJ,psbL,psbF,psbE
94779-95695	95305	0.33333	0.33333	300	psbJ,psbL,psbF,psbE
95182-95991	95573	0.32778	0.32778	295	psbF,psbE
95444-96289	95851	0.33611	0.33556	302	psbE
95696-96532	96126	0.32389	0.32333	291
95992-96785	96412	0.32167	0.32111	289	petL
96290-97033	96666	0.32111	0.32111	289	petL
96533-97316	96924	0.32056	0.32	288	petL,petG,trnWCCA
96786-97581	97171	0.32722	0.32667	294	petL,petG,trnWCCA,trnPUGG
97034-97892	97455	0.32056	0.32	288	petG,trnWCCA,trnPUGG
97317-98176	97718	0.32833	0.32778	295	trnWCCA,trnPUGG,psbJ
97582-98427	98073	0.33333	0.33222	299	trnPUGG,psaJ
97893-98684	98316	0.33222	0.33111	298	psaJ,rpl33
98177-98960	98578	0.32167	0.32111	289	rpl33
98428-99242	98814	0.31222	0.31222	281	rpl33,rps18
98685-99500	99086	0.30778	0.30778	277	rpl33,rps18
98961-99823	99368	0.30333	0.30333	273	rps18,rpl20
99243-100085	99624	0.30444	0.30444	274	rps18,rpl20
99501-100344	99940	0.31889	0.31889	287	rpl20
99824-100646	100216	0.33	0.32889	296	rpl20
100086-100921	100521	0.32778	0.32667	294	rps12
100345-101296	100790	0.30222	0.30111	271	rps12,clpP1
100647-101562	101117	0.31222	0.31222	281	rps12,clpP1
100922-101811	101419	0.31778	0.31778	286	clpP1
101297-102053	101681	0.33889	0.33889	305	clpP1
101563-102319	101934	0.33278	0.33222	299	clpP1
101812-102691	102183	0.31278	0.31222	281	clpP1
102054-102939	102510	0.30389	0.30333	273	clpP1
102320-103235	102813	0.29889	0.29889	269	clpP1
102692-103540	103087	0.31556	0.31556	284	clpP1,psbB
102940-103759	103374	0.33889	0.33889	305	clpP1,psbB
103236-104020	103657	0.33333	0.33333	300	psbB
103541-104340	103906	0.34222	0.34	306	psbB
103760-104591	104126	0.32667	0.32444	292	psbB
104021-104914	104470	0.33	0.32778	295	psbB
104341-105223	104775	0.30889	0.30889	278	psbB,psbJ
104592-105490	105078	0.31444	0.31444	283	psbB,psbJ,pbf1
104915-105777	105352	0.32111	0.32111	289	psbB,psbJ,pbf1,psbH
105224-106072	105668	0.32333	0.32333	291	psbJ,pbf1,psbH,petB
105491-106355	105904	0.31389	0.31333	282	psbH,petB
105778-106614	106202	0.29389	0.29333	264	petB
106073-106876	106502	0.30278	0.30222	272	petB
106356-107226	106732	0.29667	0.29667	267	petB
106615-107512	107070	0.30444	0.30444	274	petB,petD
106879-107794	107351	0.30667	0.30667	276	petB,petD
107227-108128	107646	0.31667	0.31667	285	petB,petD
107513-108421	107932	0.31611	0.31556	284	petD
107795-108672	108277	0.31167	0.31111	280	petD
108129-108957	108537	0.31556	0.31444	283	petD,rpoA
108422-109226	108780	0.305	0.30444	274	petD,rpoA
108673-109545	109091	0.30722	0.30667	276	petD,rpoA
108958-109809	109375	0.29556	0.29556	266	rpoA
109227-110076	109681	0.30889	0.30889	278	rpoA,rps11
109546-110410	109950	0.3	0.3	270	rpoA,rps11
109810-110696	110206	0.30556	0.30556	275	rpoA,rps11
110077-110996	110543	0.30222	0.30222	272	rps11,infA
110416-111309	110865	0.32222	0.32222	290	rps11,rpl36,infA,rps8
110697-111572	111188	0.32	0.32	288	infA,rps8
111004-111906	111447	0.31778	0.31778	286	rps8,rpl14
111310-112175	111774	0.29778	0.29778	268	rps8,rpl14
111573-112481	112045	0.28056	0.28	252	rps8,rpl14,rpl16
111907-112813	112320	0.285	0.28444	256	rpl14,rpl16
112176-113070	112602	0.28944	0.28889	260	rpl16
112482-113319	112918	0.31	0.31	279	rpl16
112814-113683	113193	0.30667	0.30667	276	rpl16
113071-113928	113520	0.29889	0.29889	269	rpl16,rps3
113320-114208	113794	0.29444	0.29444	265	rpl16,rps3
113684-114492	114081	0.30333	0.30333	273	rps3
113929-114865	114356	0.31556	0.31556	284	rps3
114209-115197	114672	0.32111	0.32111	289	rps3,rpl22
114493-115471	115006	0.32778	0.32778	295	rpl22,rps19
114866-115728	115342	0.34444	0.34444	310	rpl22,rps19,rpl2
115198-116000	115600	0.34333	0.34333	309	rps19,rpl2
115488-116304	115877	0.33556	0.33556	302	rpl2
115729-116708	116145	0.30556	0.30556	275	rpl2
116001-116972	116495	0.30778	0.30778	277	rpl2
116305-117273	116850	0.30333	0.30333	273	rpl23
116709-117554	117107	0.32167	0.32111	289	rpl23
116973-117880	117404	0.30333	0.30222	272	rpl23,trnICAU
117274-118140	117724	0.30111	0.3	270	trnICAU,ycf2
117555-118441	118015	0.30278	0.30222	272	ycf2
117881-118749	118263	0.30778	0.30778	277	ycf2
118141-118999	118613	0.32111	0.32111	289	ycf2
118442-119331	118872	0.31444	0.31444	283	ycf2
118750-119600	119154	0.30778	0.30778	277	ycf2
119000-119867	119458	0.29111	0.29111	262	ycf2
119332-120130	119723	0.27667	0.27667	249	ycf2
119601-120384	120017	0.29667	0.29667	267	ycf2
119868-120671	120246	0.29	0.29	261	ycf2
120131-120906	120522	0.30444	0.30444	274	ycf2
120385-121226	120795	0.29333	0.29333	264	ycf2
120672-121552	121098	0.30556	0.30556	275	ycf2
120907-121894	121371	0.29778	0.29778	268	ycf2
121227-122127	121761	0.31333	0.31333	282	ycf2
121553-122377	122014	0.32667	0.32667	294	ycf2
121895-122643	122247	0.32556	0.32556	293	ycf2
122128-122927	122507	0.32111	0.32111	289	ycf2
122378-123252	122776	0.30333	0.30333	273	ycf2
122644-123523	123068	0.315	0.31444	283	ycf2
122928-123847	123382	0.30833	0.30778	277	ycf2
123253-124116	123670	0.31611	0.31556	284	ycf2
123524-124386	123967	0.31111	0.31111	280	ycf2
123848-124664	124229	0.30667	0.30667	276	ycf2
124117-125018	124509	0.29889	0.29889	269	ycf2
124387-125388	124871	0.3	0.3	270	trnLCAA
124665-125740	125235	0.29722	0.29667	267	trnLCAA
125019-126064	125553	0.30833	0.30778	277	trnLCAA,ndhB
125389-126369	125879	0.31333	0.31222	281	ndhB
125741-126656	126218	0.31222	0.31111	280	ndhB
126065-127062	126498	0.3	0.29889	269	ndhB
126370-127395	126812	0.26722	0.26667	240	ndhB
126657-127595	127290	0.17111	0.17111	154	ndhB
127063-127795	127495	0.07444	0.07444	67	ndhB
127396-127995	127695	0	0	0	ndhB
127596-128195	127895	0	0	0	ndhB
127796-128395	128095	0	0	0	ndhB
127996-128595	128295	0	0	0	ndhB
128196-128795	128495	0	0	0	rps7
128396-128995	128695	0	0	0	rps7
128596-129195	128895	0	0	0	rps7
128796-129395	129095	0	0	0	rps7,rps12
128996-129595	129295	0	0	0	rps12
129196-129795	129495	0.00111	0.00111	1	rps12
129396-129995	129695	0.00111	0.00111	1	rps12
129596-130195	129895	0.00222	0.00222	2	rps12
129796-130395	130095	0.00111	0.00111	1
129996-130595	130295	0.00222	0.00222	2
130196-130795	130495	0.00111	0.00111	1
130396-130995	130695	0.00111	0.00111	1
130596-131195	130895	0	0	0
130796-131395	131095	0	0	0
130996-131595	131295	0	0	0
131196-131795	131495	0	0	0
131396-131995	131695	0	0	0	trnVGAU
131596-132195	131895	0.00111	0.00111	1	trnVGAU
131796-132395	132095	0.00111	0.00111	1	rrn16
131996-132595	132295	0.00111	0.00111	1	rrn16
132196-132795	132495	0.00111	0.00111	1	rrn16
132396-132995	132695	0.00111	0.00111	1	rrn16
132596-133195	132895	0.00111	0.00111	1	rrn16
132796-133395	133095	0	0	0	rrn16
132996-133595	133295	0	0	0	rrn16
133196-133795	133495	0	0	0	rrn16
133396-133995	133695	0	0	0	rrn16
133596-134195	133895	0	0	0	trnIGAU
133796-134395	134095	0	0	0	trnIGAU
133996-134595	134295	0	0	0	trnIGAU
134196-134795	134495	0.00111	0.00111	1	trnIGAU
134396-134995	134695	0.00111	0.00111	1	trnIGAU
134596-135195	134895	0.00111	0.00111	1	trnIGAU,trnAUGC
134796-135395	135095	0	0	0	trnAUGC
134996-135595	135295	0	0	0	trnAUGC
135196-135795	135495	0	0	0	trnAUGC
135396-135995	135695	0.00111	0.00111	1	trnAUGC
135596-136195	135895	0.00111	0.00111	1	trnAUGC
135796-136395	136095	0.00111	0.00111	1
135996-136595	136295	0	0	0
136196-136795	136495	0.00111	0.00111	1
136396-136995	136695	0.00111	0.00111	1
136596-137195	136895	0.00222	0.00222	2
136796-137395	137095	0.00111	0.00111	1
136996-137595	137295	0.00111	0.00111	1
137196-137795	137495	0	0	0
137396-137995	137695	0	0	0
137596-138195	137895	0	0	0
137796-138395	138095	0	0	0
137996-138595	138295	0	0	0
138196-138795	138495	0	0	0	rrn4.5
138396-138996	138695	0	0	0	rrn4.5
138596-139196	138895	0	0	0	rrn4.5,rrn5
138796-139396	139096	0	0	0	rrn4.5,rrn5
138997-139596	139296	0	0	0	rrn5,trnRACG
139197-139796	139496	0	0	0	trnRACG
139397-139996	139696	0	0	0	trnRACG
139597-140196	139896	0	0	0	trnNGUU
139797-140396	140096	0	0	0	trnNGUU
139997-140596	140296	0	0	0	trnNGUU,ycf1
140197-140796	140496	0	0	0	trnNGUU,ycf2
140397-140996	140696	0	0	0	ycf1
140597-141196	140896	0	0	0	ycf1
140797-141397	141096	0	0	0	ycf1
140997-141597	141297	0	0	0	ycf1
141197-141797	141497	0	0	0	ycf1
141398-141997	141697	0	0	0	ycf1
141598-142197	141897	0	0	0	ycf1,ndhF
141798-142397	142097	0	0	0	ndhF
141998-142597	142297	0.00111	0.00111	1	ndhF
142198-142797	142497	0.00111	0.00111	1	ndhF
142398-142997	142697	0.00111	0.00111	1	ndhF
142598-143197	142897	0	0	0	ndhF
142798-143397	143097	0	0	0	ndhF
142998-143597	143297	0	0	0	ndhF
143198-143797	143497	0	0	0	ndhF
143398-143997	143697	0	0	0	ndhF
143598-144197	143897	0	0	0	ndhF
143798-144397	144097	0	0	0	ndhF
143998-144597	144297	0	0	0	ndhF
144198-144797	144497	0	0	0	ndhF
144398-144997	144697	0	0	0	ndhF
144598-145197	144897	0	0	0	ndhF
144798-145397	145097	0	0	0	ndhF,rpl32
144998-145597	145297	0	0	0	rpl32
145198-145797	145497	0	0	0
145398-145997	145697	0	0	0
145598-146197	145897	0	0	0	trnLUAG
145798-146397	146097	0	0	0	trnLUAG,ccsA
145998-146597	146297	0	0	0	ccsA
146198-146797	146497	0.00111	0.00111	1	ccsA
146398-146997	146697	0.00111	0.00111	1	ccsA
146598-147197	146897	0.00111	0.00111	1	ccsA
146798-147397	147097	0	0	0	ccsA
146998-147597	147297	0	0	0	ndhD
147198-147797	147497	0	0	0	ndhD
147398-147997	147697	0	0	0	ndhD
147598-148197	147897	0	0	0	ndhD
147798-148397	148097	0	0	0	ndhD
147998-148597	148297	0	0	0	ndhD
148198-148797	148497	0	0	0	ndhD
148398-148997	148697	0	0	0	ndhD
148598-149197	148897	0	0	0	ndhD,psaC
148798-149397	149097	0	0	0	psaC
148998-149597	149297	0	0	0	psaC
149198-149797	149497	0	0	0	ndhE
149398-149997	149697	0	0	0	ndhE
149598-150197	149897	0	0	0	ndhE
149798-150397	150097	0	0	0	ndhG
149998-150597	150297	0	0	0	ndhG
150198-150797	150497	0	0	0	ndhG
150398-150997	150697	0	0	0	ndhG
150598-151197	150897	0	0	0	ndhI
150798-151398	151097	0	0	0	ndhI
150998-151598	151297	0	0	0	ndhI
151198-151799	151498	0	0	0	ndhI,ndhA
151399-151999	151698	0	0	0	ndhA
151599-152199	151899	0	0	0	ndhA
151800-152399	152099	0	0	0	ndhA
152000-152599	152299	0	0	0	ndhA
152200-152799	152499	0	0	0	ndhA
152400-152999	152699	0	0	0	ndhA
152600-153199	152899	0	0	0	ndhA
152800-153399	153099	0	0	0	ndhA
153000-153599	153299	0.00222	0.00222	2	ndhA
153200-153816	153499	0.00667	0.00667	6	ndhA,ndhH
153400-154027	153699	0.00889	0.00889	8	ndhA,ndhH
153600-154227	153922	0.00778	0.00778	7	ndhA,ndhH
153817-154427	154127	0.00333	0.00333	3	ndhH
154028-154627	154327	0.00333	0.00333	3	ndhH
154228-154827	154527	0.00444	0.00444	4	ndhH
154428-155027	154727	0.00444	0.00444	4	ndhH
154628-155227	154927	0.00222	0.00222	2	ndhH,rps15
154828-155427	155127	0.00111	0.00111	1	rps15
155028-155627	155327	0.00111	0.00111	1	rps15
155228-155827	155527	0.00111	0.00111	1
155428-156027	155727	0	0	0
155628-156229	155927	0.00222	0.00222	2
155828-156429	156127	0.00444	0.00444	4
156028-156636	156329	0.00667	0.00667	6
156230-156836	156529	0.00444	0.00444	4
156430-157036	156736	0.00444	0.00444	4
156637-157236	156936	0.00333	0.00333	3
156837-157440	157136	0.00333	0.00333	3
157037-157641	157340	0.00222	0.00222	2
157237-157841	157540	0.00333	0.00333	3
157441-158041	157741	0.00556	0.00556	5
157642-158241	157941	0.00444	0.00444	4
157842-158441	158141	0.00333	0.00333	3
158042-158641	158341	0.00111	0.00111	1
158242-158841	158541	0.00111	0.00111	1
158442-159041	158741	0	0	0
158642-159242	158941	0	0	0
158842-159442	159141	0	0	0
159042-159642	159342	0	0	0
159243-159842	159542	0	0	0
159443-160042	159742	0	0	0
159643-160201	159922	0.00119	0.00119	1
